# Supplementary material for: High Efficient Expression and Purification of Human Epidermal Growth Factor in Arachis Hypogaea L
Source: MDPI journal article supplement (doi:10.3390/ijms20082045), 2019-04-25
Supplement: s1 [file s1]

## Supplementary Figure S1

### Protein View

Match to: **201809994** Score: **2257**

Found in search of C:\Users\DELL\Desktop\LCMSMS\10.22LCMSMS\09994-2.mgf

Nominal mass ( $M_r$ ): **6691**; Calculated pI value: **4.78**

NCBI BLAST search of [201809994](#) against nr

Unformatted [sequence string](#) for pasting into other applications

Fixed modifications: Carbamidomethyl (C)

Variable modifications: Acetyl (Protein N-term), Deamidated (NQ), Dioxidation (W), Oxidation (M)

Cleavage by Trypsin: cuts C-term side of KR unless next residue is P

Sequence Coverage: **46%**

Matched peptides shown in **Bold Red**

**1 MNSDSECPHS HDGYCLHDGV CMYIEALDKY **ACNCVVGYG ERCQYRDLKW****  
**51 **WELR****

| Start - End    | Observed        | Mr (expt)        | Mr (calc)        | ppm       | Miss Sequence                                                 |
|----------------|-----------------|------------------|------------------|-----------|---------------------------------------------------------------|
| <b>30 - 42</b> | <b>780.8501</b> | <b>1559.6856</b> | <b>1559.6861</b> | <b>-0</b> | <b>0 K.YACNCVVGYGIGER.C</b> ( <a href="#">Ions score 71</a> ) |
| <b>43 - 49</b> | <b>491.7436</b> | <b>981.4727</b>  | <b>981.4702</b>  | <b>3</b>  | <b>1 R.CQYRDLK.W</b> ( <a href="#">Ions score 4</a> )         |
| <b>47 - 54</b> | <b>573.3063</b> | <b>1144.5981</b> | <b>1144.6029</b> | <b>-4</b> | <b>1 R.DLKWWELR.-</b> ( <a href="#">Ions score 40</a> )       |
| <b>50 - 54</b> | <b>395.2063</b> | <b>788.3980</b>  | <b>788.3969</b>  | <b>1</b>  | <b>0 K.WWELR.-</b> ( <a href="#">Ions score 14</a> )          |

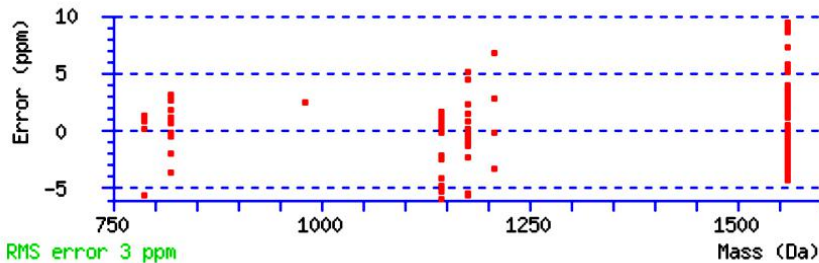

### Supplementary Figure S1. Identification of hEGF protein via MALDI-TOF-MS

Proteolytic enzyme trypsin was used to perform specific protein digestion at lysine and arginine and four short peptide sequence were identified by MALDI-TOF-MS analysis.

## Supplementary Figure S2

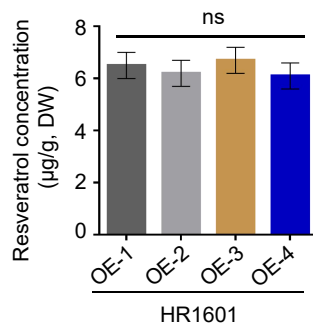

### Supplementary Figure S2. The contents identification of resveratrol in different hEGF transgenic hairy roots

Expression analysis of resveratrol in various peanut hairy root lines. Error bars indicate SEM ( $n = 3$ ). Student's *t*-test. ns, no statistic significance. These experiments were repeated three times with similar results. DW, dry weight.
